# Supplementary material for: Fatigue in patients with inflammatory bowel disease—strongly influenced by depression and not identifiable through laboratory testing: a cross-sectional survey study
Source: PubMed Central journal article supplement (PMC10463723; doi:10.1186/s12876-023-02906-0), 2023-08-22
Supplement: 12876_2023_2906_MOESM1_ESM.pdf [file 12876_2023_2906_MOESM1_ESM.pdf]

Additional File 1: Correlation between IBDQ items / domains and the total fatigue score by Pearson's correlation coefficient

| IBDQ item / domain                      | Total Fatigue Score Value |                     |              |                       |                    |                     |              |                       |
|-----------------------------------------|---------------------------|---------------------|--------------|-----------------------|--------------------|---------------------|--------------|-----------------------|
|                                         | Crohn's disease           |                     |              |                       | Ulcerative colitis |                     |              |                       |
|                                         | N                         | Pearson Correlation | p-value*     | R <sup>2</sup> -value | N                  | Pearson Correlation | p-value*     | R <sup>2</sup> -value |
| Item 1 stool frequency                  | 112                       | -0.356              | <b>0.001</b> | 0.127                 | 76                 | -0.203              | 0.078        | 0.041                 |
| Item 2 tired / worn out                 | 113                       | -0.750              | <b>0.001</b> | 0.563                 | 76                 | -0.717              | <b>0.001</b> | 0.514                 |
| Item 3 frustrated / impatient           | 113                       | -0.603              | <b>0.001</b> | 0.364                 | 76                 | -0.581              | <b>0.001</b> | 0.338                 |
| Item 4 work / school                    | 113                       | -0.404              | <b>0.001</b> | 0.163                 | 76                 | -0.455              | <b>0.001</b> | 0.207                 |
| Item 5 loose stools                     | 113                       | -0.396              | <b>0.001</b> | 0.157                 | 76                 | -0.140              | 0.229        | 0.020                 |
| Item 6 energy                           | 112                       | -0.641              | <b>0.001</b> | 0.411                 | 76                 | -0.655              | <b>0.001</b> | 0.429                 |
| Item 7 worried about surgery            | 113                       | -0.218              | <b>0.020</b> | 0.046                 | 76                 | -0.223              | 0.053        | 0.050                 |
| Item 8 cancel social engagement         | 113                       | -0.435              | <b>0.001</b> | 0.189                 | 76                 | -0.455              | <b>0.001</b> | 0.207                 |
| Item 9 abdominal cramps                 | 112                       | -0.522              | <b>0.001</b> | 0.272                 | 76                 | -0.354              | <b>0.002</b> | 0.125                 |
| Item 10 generally unwell                | 112                       | -0.613              | <b>0.001</b> | 0.376                 | 75                 | -0.561              | <b>0.001</b> | 0.315                 |
| Item 11 fear of not finding a toilet    | 112                       | -0.508              | <b>0.001</b> | 0.258                 | 75                 | -0.290              | <b>0.012</b> | 0.084                 |
| Item 12 leisure or sports activities    | 112                       | -0.612              | <b>0.001</b> | 0.375                 | 75                 | -0.542              | <b>0.001</b> | 0.294                 |
| Item 13 abdominal pain                  | 113                       | -0.585              | <b>0.001</b> | 0.342                 | 76                 | -0.455              | <b>0.001</b> | 0.207                 |
| Item 14 sleeping disturbance            | 113                       | -0.477              | <b>0.001</b> | 0.228                 | 76                 | -0.357              | <b>0.002</b> | 0.127                 |
| Item 15 depressed/discouraged           | 113                       | -0.653              | <b>0.001</b> | 0.426                 | 76                 | -0.686              | <b>0.001</b> | 0.471                 |
| Item 16 avoid events without toilet     | 113                       | -0.440              | <b>0.001</b> | 0.194                 | 76                 | -0.397              | <b>0.001</b> | 0.158                 |
| Item 17 passing gas                     | 113                       | -0.445              | <b>0.001</b> | 0.198                 | 76                 | -0.127              | 0.275        | 0.016                 |
| Item 18 weight problems                 | 113                       | -0.313              | <b>0.001</b> | 0.098                 | 76                 | -0.245              | <b>0.033</b> | 0.060                 |
| Item 19 disease-related worries         | 113                       | -0.434              | <b>0.001</b> | 0.188                 | 76                 | -0.367              | <b>0.001</b> | 0.135                 |
| Item 20 abdominal bloating              | 113                       | -0.549              | <b>0.001</b> | 0.301                 | 76                 | -0.239              | <b>0.038</b> | 0.057                 |
| Item 21 relaxed/free of tension         | 113                       | -0.620              | <b>0.001</b> | 0.384                 | 76                 | -0.465              | <b>0.001</b> | 0.216                 |
| Item 22 rectal bleeding                 | 113                       | -0.176              | 0.063        | 0.031                 | 76                 | -0.214              | 0.064        | 0.046                 |
| Item 23 embarrassed                     | 113                       | -0.476              | <b>0.001</b> | 0.227                 | 76                 | -0.425              | <b>0.001</b> | 0.181                 |
| Item 24 feeling of defecation need      | 113                       | -0.508              | <b>0.001</b> | 0.258                 | 76                 | -0.331              | <b>0.003</b> | 0.110                 |
| Item 25 tearful or upset                | 113                       | -0.619              | <b>0.001</b> | 0.383                 | 76                 | -0.607              | <b>0.001</b> | 0.368                 |
| Item 26 soiling                         | 113                       | -0.458              | <b>0.001</b> | 0.210                 | 76                 | -0.201              | 0.082        | 0.040                 |
| Item 27 angry                           | 113                       | -0.489              | <b>0.001</b> | 0.240                 | 76                 | -0.317              | <b>0.005</b> | 0.100                 |
| Item 28 sexual activity                 | 113                       | -0.439              | <b>0.001</b> | 0.193                 | 76                 | -0.382              | <b>0.001</b> | 0.146                 |
| Item 29 sick to your stomach            | 113                       | -0.438              | <b>0.001</b> | 0.192                 | 76                 | -0.322              | <b>0.005</b> | 0.104                 |
| Item 30 irritable                       | 113                       | -0.490              | <b>0.001</b> | 0.240                 | 76                 | -0.550              | <b>0.001</b> | 0.303                 |
| Item 31 lack of understanding           | 113                       | -0.454              | <b>0.001</b> | 0.206                 | 76                 | -0.494              | <b>0.001</b> | 0.244                 |
| Item 32 satisfaction with personal life | 112                       | -0.628              | <b>0.001</b> | 0.394                 | 76                 | -0.531              | <b>0.001</b> | 0.282                 |
| Bowel symptoms domain                   | 111                       | -0.652              | <b>0.001</b> | 0.425                 | 76                 | -0.372              | <b>0.001</b> | 0.138                 |
| Systemic symptoms domain                | 111                       | -0.726              | <b>0.001</b> | 0.527                 | 75                 | -0.682              | <b>0.001</b> | 0.465                 |
| Emotional function domain               | 111                       | -0.709              | <b>0.001</b> | 0.503                 | 75                 | -0.603              | <b>0.001</b> | 0.364                 |
| Social function domain                  | 112                       | -0.595              | <b>0.001</b> | 0.354                 | 76                 | -0.563              | <b>0.001</b> | 0.317                 |
| IBDQ total score                        | 111                       | -0.745              | <b>0.001</b> | 0.555                 | 76                 | -0.597              | <b>0.001</b> | 0.356                 |

\*= significant for all p<0.05
